# Supplementary material for: Gluten-Free Bread Enriched with Artichoke Leaf Extract In Vitro Exerted Antioxidant and Anti-Inflammatory Properties
Source: MDPI journal article supplement (doi:10.3390/antiox12040845), 2023-04-01
Supplement: s1 [file s1]

**Supplementary Table S1.** Significantly different compounds (p-value <0.05; one way ANOVA test corrected by Tukey's procedure) found between gluten free bread fermented fecal batches after 20h (T20) of fermentation. Breads were differently labelled based on the use of sourdough (SB) or not (YB) and based on the artichoke extract (AE) addition.

| Compound                    | f-value | p-value    | FDR      | Tukey's HSD                                                                                        |
|-----------------------------|---------|------------|----------|----------------------------------------------------------------------------------------------------|
| Hexanal                     | 21.725  | 0.00033581 | 0.01151  | SBAE-T20 vs SB-T20; YB-T20 vs SB-T20; YBAE-T20 vs SB-T20; YBAE-T20 vs SBAE-T20; YBAE-T20 vs YB-T20 |
| Oxirane, tetradecyl-        | 20.817  | 0.00039016 | 0.01151  | SBAE-T20 vs SB-T20; YB-T20 vs SBAE-T20; YBAE-T20 vs SBAE-T20                                       |
| 1-Propanol                  | 14.274  | 0.0014125  | 0.02778  | YB-T20 vs SB-T20; YBAE-T20 vs SB-T20                                                               |
| Pentadecanal-               | 10.766  | 0.0035052  | 0.039647 | SBAE-T20 vs SB-T20; YB-T20 vs SBAE-T20; YBAE-T20 vs SBAE-T20                                       |
| Undecane                    | 10.392  | 0.0039133  | 0.039647 | YB-T20 vs SB-T20; YBAE-T20 vs SB-T20; YB-T20 vs SBAE-T20; YBAE-T20 vs SBAE-T20                     |
| Decane                      | 10.188  | 0.0041613  | 0.039647 | YB-T20 vs SB-T20; YB-T20 vs SBAE-T20; YBAE-T20 vs YB-T20                                           |
| Hydrocinnamic acid          | 9.544   | 0.0050841  | 0.039647 | SBAE-T20 vs SB-T20; YB-T20 vs SBAE-T20; YBAE-T20 vs SBAE-T20                                       |
| 3-Ethyl-3-methylheptane     | 9.3703  | 0.0053759  | 0.039647 | YB-T20 vs SB-T20; YB-T20 vs SBAE-T20; YBAE-T20 vs YB-T20                                           |
| Butanoic acid, ethyl ester  | 8.3872  | 0.0074857  | 0.048452 | SBAE-T20 vs SB-T20; YBAE-T20 vs SBAE-T20                                                           |
| Benzaldehyde, 2,5-dimethyl- | 8.0225  | 0.0085254  | 0.048452 | YB-T20 vs SBAE-T20; YBAE-T20 vs SBAE-T20                                                           |
| Dodecane                    | 7.864   | 0.0090334  | 0.048452 | YB-T20 vs SB-T20; YB-T20 vs SBAE-T20                                                               |

**Supplementary Table S2.** Significantly different compounds (p-value <0.05; one way ANOVA test corrected by Tukey's procedure) found between gluten free bread fermented fecal batches after 42h (T42) of fermentation. Breads were differently labelled based on the use of sourdough (SB) or not (YB) and based on the artichoke extract (AE) addition.

| Compound                 | f.value | p.value    | FDR        | Tukey's HSD                                                                                        |
|--------------------------|---------|------------|------------|----------------------------------------------------------------------------------------------------|
| Ethanol                  | 80.894  | 2.5197e-06 | 0.00013859 | SBAE-T42 vs SB-T42; YB-T42 vs SB-T42; YBAE-T42 vs SB-T42; YBAE-T42 vs YB-T42                       |
| 1-Butanol                | 61.47   | 7.2312e-06 | 0.00019886 | SBAE-T42SB-T42; YB-T42SB-T42; YBAE-T42 vs SB-T42                                                   |
| Hexanoic acid            | 48.148  | 1.8269e-05 | 0.00032756 | YB-T42 vs SB-T42; YBAE-T42 vs SB-T42; YB-T42 vs SBAE-T42; YBAE-T42 vs SBAE-T42; YBAE-T42 vs YB-T42 |
| Hydrocinnamic acid       | 44.867  | 2.3823e-05 | 0.00032756 | SBAE-T42 vs SB-T42; YBAE-T42 vs SB-T42; YB-T42 vs SBAE-T42; YBAE-T42 vs SBAE-T42                   |
| Heptanoic acid           | 38.077  | 4.3958e-05 | 0.00048354 | SBAE-T42 vs SB-T42; YBAE-T42 vs SB-T42; YB-T42 vs SBAE-T42; YBAE-T42 vs YB-T42                     |
| 9-Octadecenal, (Z)-      | 33.9    | 6.7541e-05 | 0.00061912 | SBAE-T42 vs SB-T42; YBAE-T42 vs SB-T42; YB-T42 vs SBAE-T42; YBAE-T42 vs SBAE-T42                   |
| Pentanoic acid           | 28.016  | 0.00013543 | 0.00098149 | SBAE-T42 vs SB-T42; YBAE-T42 vs SB-T42; YB-T42 vs SBAE-T42; YBAE-T42 vs YB-T42                     |
| Butanoic acid, 3-methyl- | 27.611  | 0.00014276 | 0.00098149 | YBAE-T42 vs SB-T42; YB-T42 vs SBAE-T42; YBAE-T42 vs SBAE-T42; YBAE-T42 vs YB-T42                   |
| Tetradecanal             | 26.66   | 0.00016201 | 0.00099005 | SBAE-T42 vs SB-T42; YB-T42 vs SBAE-T42; YBAE-T42 vs SBAE-T42                                       |
| Butanoic acid            | 25.222  | 0.00019767 | 0.0010872  | SBAE-T42 vs SB-T42; YBAE-T42 vs SB-T42; YB-T42 vs SBAE-T42; YBAE-T42 vs YB-T42                     |

|                                |        |            |           |                                                                                  |
|--------------------------------|--------|------------|-----------|----------------------------------------------------------------------------------|
| Phenylethyl Alcohol            | 20.593 | 0.00040521 | 0.002026  | SBAE-T42 vs SB-T42; YBAE-T42 vs SB-T42; YB-T42 vs SBAE-T42; YBAE-T42 vs YB-T42   |
| Octadecanal                    | 18.36  | 0.00060341 | 0.0027656 | SBAE-T42 vs SB-T42; YB-T42 vs SBAE-T42; YBAE-T42 vs SBAE-T42                     |
| 2,4-Di-tert-butylphenol        | 17.421 | 0.00072256 | 0.0029333 | SBAE-T42 vs SB-T42; YBAE-T42 vs SB-T42; YB-T42 vs SBAE-T42; YBAE-T42 vs SBAE-T42 |
| 2-Tetradecanone                | 17.254 | 0.00074666 | 0.0029333 | SBAE-T42 vs SB-T42; YB-T42 vs SBAE-T42; YBAE-T42 vs SBAE-T42                     |
| Methyl Isobutyl Ketone         | 15.937 | 0.00097744 | 0.0035839 | YBAE-T42 vs SB-T42; YB-T42 vs SBAE-T42; YBAE-T42 vs YB-T42                       |
| Gamma-Dodecalactone            | 15.017 | 0.0011933  | 0.0040694 | SBAE-T42 vs SB-T42; YB-T42 vs SBAE-T42; YBAE-T42 vs SBAE-T42                     |
| Propanoic acid, 2-methyl-      | 14.782 | 0.0012578  | 0.0040694 | SBAE-T42 vs SB-T42; YBAE-T42 vs SB-T42; YB-T42 vs SBAE-T42; YBAE-T42 vs YB-T42   |
| p-Cresol                       | 14.276 | 0.001412   | 0.0043144 | SBAE-T42 vs SB-T42; YBAE-T42 vs SB-T42; YB-T42 vs SBAE-T42; YBAE-T42 vs YB-T42   |
| 8-Methylnonanoic acid          | 13.917 | 0.0015358  | 0.0044457 | SBAE-T42 vs SB-T42; YB-T42 vs SBAE-T42; YBAE-T42 vs SBAE-T42                     |
| 1-Propanol                     | 11.435 | 0.0028991  | 0.0078621 | SBAE-T42 vs SB-T42; YBAE-T42 vs SB-T42; YB-T42 vs SBAE-T42; YBAE-T42 vs YB-T42   |
| Dodecanal                      | 11.309 | 0.0030019  | 0.0078621 | SBAE-T42 vs SB-T42; YBAE-T42 vs SBAE-T42                                         |
| Phenol                         | 10.696 | 0.0035768  | 0.008942  | YBAE-T42 vs SB-T42; YB-T42 vs SBAE-T42; YBAE-T42 vs YB-T42                       |
| Benzaldehyde, 2,5-dimethyl-    | 10.052 | 0.0043373  | 0.010372  | YB-T42 vs SB-T42; YBAE-T42 vs YB-T42                                             |
| Hexanoic acid, ethyl ester     | 9.7699 | 0.0047339  | 0.010848  | YBAE-T42 vs SBAE-T42                                                             |
| Cyclohexanecarboxylic acid     | 9.4314 | 0.0052709  | 0.011596  | YB-T42 vs SB-T42; YB-T42 vs SBAE-T42                                             |
| 1H-Pyrrole-2,5-dione, 3-ethyl- | 9.2999 | 0.0054999  | 0.011634  | SBAE-T42 vs SB-T42; YB-T42 vs SBAE-T42; YBAE-T42 vs SBAE-T42                     |
| Undecane                       | 8.7574 | 0.0065871  | 0.013258  | YB-T42 vs SB-T42; YBAE-T42 vs YB-T42                                             |
| Benzaldehyde                   | 8.6859 | 0.0067497  | 0.013258  | SBAE-T42 vs SB-T42; YB-T42 vs SBAE-T42                                           |
| 1H-Indole, 4-methyl-           | 7.7279 | 0.0094999  | 0.018017  | SBAE-T42 vs SB-T42; YB-T42 vs SB-T42; YBAE-T42 vs SB-T42                         |
| Propanoic acid                 | 7.3238 | 0.011074   | 0.020303  | SBAE-T42 vs SB-T42; YB-T42 vs SB-T42; YBAE-T42 vs SB-T42                         |
| 2-Tridecanone                  | 7.0796 | 0.012185   | 0.021618  | YB-T42 vs SBAE-T42; YBAE-T42 vs SBAE-T42                                         |
| 2-Pentadecanone                | 6.3054 | 0.016759   | 0.028804  | SBAE-T42 vs SB-T42; YBAE-T42 vs SBAE-T42                                         |
| 2-Dodecanone                   | 5.6122 | 0.02281    | 0.038017  | YB-T42 vs SBAE-T42                                                               |
| 3-Pentanone, 2-methyl-         | 5.5327 | 0.023667   | 0.038285  | YBAE-T42 vs YB-T42                                                               |
